# Supplementary material
Source: MDPI journal article supplement (https://www.mdpi.com/2225-1154/5/4/80)
Supplement: s1 [file s1]

## Sheet: Legend
Google Scholar
Web of Science
Articles added post-hoc
Articles used in review

## Sheet: Compiled texts
First Author	Type of Publication	Title	Year	Type	Valid (1-Nepal, 2- Himalayas, 3 - Indian Subcontinent) * indicates region is included in global study	Key topic								Utility for rview	Source Engine
Agrawala, Shardul	Conference paper: Planning document from Organisation for Economic Co-operation and Development	Development and Climate Change in Nepal: Focus on Water Resources and Hydropower	2003	CLIM	1	Climate trends in Nepal, climate concerns focused on by NGO/IGOs and the use of hydropower									GS
Aryal, Achyut	Theor Appl Climatol	Impact of climate change on human-wildlife-ecosystem interactions in the Trans-Himalaya region of Nepal	2014	BIOD	2	Interactions between humans and wildlife in trans-himalaya region, as affected by climatic changes									GS
Chaudhury, Pashupati	Current Science	Consistency of local perceptions of climate change in the Kangchenjunga Himalaya landscape	2011	LOC	2	Local surveys of people's perceptions of climate change in Kanchenjunga region									GS
Chaudhury, Pashupati	Journal of Forest & Livelihood	Global Warming in Nepal: Challenges and Policy Imperatives	2009	POL	1	Overview of climate change background of Nepal, policies in place, future risks to consider									GS
Dahal, Ngamindra	Paper presented at Warden Seminar	Implications of Climate Change on Biodiversity in Nepal: Some Observations and Opportunities	2006	BIOD	1	Overview of climate change impacts on communities and biodiversity in Nepal									GS
Forrest, Jessica L.	Biological Conservation	Conservation and climate change: Assessing the vulnerability of snow leopard habitat to treeline shift in the Himalaya	2012	BIOD	2	Shrinking of alpine zone and treeline shifts due to climate change, effects on snow leopard distribution								Case study	GS
Gaire ,N. P.	Climatic Past	Treeline dynamics with climate change at the central Nepal Himalaya	2014	BIOD	2	Treeline shifts due to climate change in Central Nepal								Case study tree lines	GS
Gentle, Popular	Environmental Science & Policy	Climate change, poverty and livelihoods: adaptation practices by rural mountain communities in Nepal	2012	LOC	1	Climate change adaptation strategies used by local communities to support livelihoods in Jumla District of Nepal									GS
Kripalani, R. H.	Theor Appl Climatol	South Asian summer monsoon precipitation variability: Coupled climate model simulations and projections under IPCC AR4	2007	CLIM	3	Changes in summer monsoon, climate models and predictions									GS
Maharjan, S. K.	International NGO Journal	Tharu community’s perception on climate changes and their adaptive initiations to withstand its impacts in Western Terai of Nepal	2011	LOC	1	Local perception and adaptation strategies to Climate Change in Western Nepal/Tharu									GS
Malla, G.	Journal of Agriculture & environment	Climate Change and its impact on Nepalese AgricultureCLIMATE CHANGE AND ITS IMPACT ON NEPALESE AGRICULTURE	2008	BIOD	1	CO2, Temperature and Rainfall variation in relation to changes in crop production								CCHc review; CropsReview	GS
Manandhar, Sujata	Reg Environ Change	Adapting cropping systems to climate change in Nepal: a cross-regional study of farmers’ perception and practices	2011	LOC	1	Perception and adaptation to climate change among farmers in Terai and Himalayas									GS
Ojha, Hemant	Journal of Forest & Livelihood	Climate Change, Forestry and Carbon Financing in Nepal: Editorial Introduction	2009	ES	1	REDD initiative and implications in Nepal, carbon reserves in Nepal's forests									GS
Schlütz, Frank	Veget Hist Archaeobot	Palynological investigations on vegetation and climate change in the Late Quaternary of Lake Rukche area, Gorkha Himal, Central Nepal	2004	PAST	1	Assessment of plant/vegetation sediment to evaluate climate change effects during the Late Quaternary in the Lake Rukche area, Nepal									GS
Sharma, Eklabya	IMBC Plenary session	Biodiversity in the Himalayas – Trends, Perception and Impacts of Climate Change	NA	BIOD	2	Rainfall and temperature patterns in Eastern Nepal, Implications for biodiversity and potential vegetation shifts									GS
Shrestha, Arun B.	American Meteorological Society	Maximum Temperature Trends in the Himalaya and Its Vicinity: An Analysis Based on Temperature Records from Nepal for the Period 1971–94	1999	CLIM	3	71-94 Temperature trends in the Himalayas									GS
Shrestha, Arun B.	Reg Environ Change	Climate change in Nepal and its impact on Himalayan glaciers	2011	HYDR	2	Changes in hydrological regime and river flow in Shorong, Khumbu, Langtang, Dhaulagiri and Kanchenjunga regions									GS
Telwala, Yasmeen	Plos One	Climate-Induced Elevational Range Shifts and Increase in Plant Species Richness in a Himalayan Biodiversity Epicentre	2013	BIOD	2	Elevational shifts in plant species richness and assemblages in the Alpine valleys of Sikkim *near region, not Nepal - using historical and recent data									GS
Turner, Andrew	Review article Nature Climate Change	Climate change and the South Asian summer monsoon	2012	CLIM	3	Monsoon variability in South Asia									GS
Xu, Jianchu	Conservation Biology	The Melting Himalayas: Cascading Effects of Climate Change on Water, Biodiversity, and Livelihoods	2009	BIOD	2	Effects of increasing temperature and loss of ice in the Himalayas									GS
Carpenter, C.	Journal of Biogeography	The environmental control of plant species density on a Himalayan elevation gradient	2005	BIOD	1	Understory species density assessment and evaluation of environmental controls at elevational gradient									WoS
Chaudhury, Pashupati	Biology Letters	Local perceptions of climate change validated by scientific evidence in the Himalayas	2011	LOC	2	Local preception and knowledge survey at regions of varying altitudes in the Himalayas									WoS
Chitale, V. S.	Journal of Earth System Science	Analysing land and vegetation cover dynamics during last three decades in Katerniaghat wildlife sanctuary, India	2014	BIOD	3	Impacts of climate change on land and vegetation cover over the last three decades in Indo-Nepal border									WoS
Devkota, Bimala Devi	Journal of The Faculty of Agriculture Kyushu University	Climatic Variability and Impacts on Biodiversity at Local Level: A case Study from Kanchanjanga Conservation Area, Nepal	2012	LOC	1	Field and local surveys on impact of climatic variability on biodiversity and livelihood in Kanchanjunga Conservation Area (KCA), Nepal									WoS
Dhital, Yam Prasad	Journal of Geographical Sciences	Hydroclimatological changes in the Bagmati River Basin, Nepal	2013	HYDR	1	Climate indicators and hydroclimatological changes over the last three decades in the Bagmati River Basin, Nepal									WoS
Fen, Jianmeng	Ecology & Evolution	Support for the elevational Rapoport's rule among seed plants in Nepal depends on biogeographical affinities and boundary effects	2016	BIOD	1	Testing elevational Rapoport's rule between tropical and temperate species of seed plants in Nepal									WoS
Ferrarini, Alessandro	Ecological Complexity	Prediction of climate warming impacts on plant species could be more complex than expected. Evidence from a case study in the Himalaya	2014	BIOD	1	Current, potential and predicted distributions of two plant species under different warming scenarios in the Sagarmatha National Park (Nepal)									WoS
Giam, Xingli	Biological Conservation	Future habitat loss and the conservation of plant biodiversity	2010	BIOD	*	Broad conservation assessment: habitat loss of plant biodiversity									WoS
Konchar, Katie M.	Journal of Ethnobiology	Adapting in the Shadow of Annapurna: A climate tipping point	2015	LOC	1	Perception and socio-cultural implications of climate related change in Manang, Nepal									WoS
Kunwar, Ripu M.	Plos One	Land-Use and Socioeconomic Change, Medicinal Plant Selection and Biodiversity Resilience in Far Western Nepal	2016	LOC, BIOD	1	Effects on indigenous systems and local biodiversity due to land-use, invasive species, climate change and other sociocultural changes in Far Western Nepal									WoS
McCain, Christy M.	Ecology Letters	Assessing the threat to montane biodiversity from discordant shifts in temperature and precipition in a changing climate	2011	CLIM	*	Local vertebrate population extirpation risk for next 100 years at different climate change scenarios: Global study									WoS
Pandey, Shiva Shankar	Forest Ecology & Management	Assessing the roles of community forestry in climate change mitigation and adaptation: A case study from Nepal	2016	LOC	1	Analysis of climate change mitigation and adaptation strategies implemented in community forests of Nepal									WoS
Salick, Jan	Journal of Ethnobiology	Himalayan Alpine vegetation, Climate Change and Mitigation	2014	BIOD	2	Effects of environmental and climate change (elevation, precipitation and biogeography) on Himalayan alpine plants									WoS
Shah, Ram Devi Tachamo	Climatic Change	The climate sensitive zone along an altitudinal gradient in central Himalayan rivers: a useful concept to monitor climate change impacts in mountain regions	2015	BIOD	2	Test of the Climate Sensitive Zone concept on benthic macroinvertebrates in riverine ecosystems using Himalayan streams of Nepal as an example									WoS
Shrestha, Arun B.	International Journal of Climatology	Observed trends and changes in daily temperature and precipitation extremes over the Koshi river basin 1975-2010	2017	CLIM	1	Climatological variability and trends over the Koshi river basin									WoS
Shrestha, Uttam Babu	Plos One	Impact of Climate Change on Potential Distribution of Chinese Caterpillar Fungus (Ophiocordyceps sinensis) in Nepal Himalaya	2014	BIOD	1	MaxEnt modeling current and future distribution of Chinese caterpillar fungus in different climate change scenarios									WoS
Shrestha, Uttam Babu	Plos One	Widespread Climate Change in the Himalayas and Associated Changes in Local Ecosystems	2012	BIOD	1	Large scale climatic and phenological changes in the Himalayas
Stapp, Jared R.	Environmental Management	Linking Attitudes, Policy, and Forest Cover Change in Buffer Zone Communities of Chitwan National Park, Nepal	2016	LOC	1	Perception of forest loss due to climate change in Chitwan, Nepal									WoS
Thapa, Gokarna Jung	Current Science	Assessing climate change impacts on forest ecosystems for landscape-scale spatial planning in Nepal	2016	CLIM	1	Climate change integrated conservation planning through modeling of potential climate refugia (forests) in Nepal									WoS
Zomer, Robert J.	Climatic Change	Projected climate change impacts on spatial distribution of bioclimatic zones and ecoregions within the Kailash Sacred Landscape of China, India, Nepal	2014	CLIM	3	Potential impacts of climate change on spatial distribution of bioclimatic strata and ecoregions within Kailash Sacred Landsape									WoS
Acharya et al.	Plos One														Post-hoc
Acharya	ICRLFB Conference														Post-hoc
Baral	Ecological Economics														Post-hoc
Barnett et al.	Nature														Post-hoc
Bhat	Quarterly Journal from the Royal Meteorogical Society														Post-hoc
Bhattarai	Global Ecology & Biogeography														Post-hoc
Bhattarai	Journal of Mountain Science														Post-hoc
Corlett & LaFrankie	Climatic Change														Post-hoc
Diaz et al.	Climatic Change														Post-hoc
Gaire et al.	Nepal Journal of Science and Technology	Dynamics of Abies spectabilis in relation to climate change at the treeline ecotone in Langtang National Park	2011	BIOD	1	Population dynamics of Abies spectabilis in relation to climate change in Langtang National Park in Nepal									Post-hoc
IUCN Nepal	Conference Review														Post-hoc
Lal et al.	Current Science														Post-hoc
Lau et al.	Climate Dynamics														Post-hoc
Nogues-Bravo et al.	Global Environmental Change														Post-hoc
Paudel et al.	Book chapter														Post-hoc
Saeed et al.	Climate Dynamics														Post-hoc
Saeed et al.	Geophysical Research Letters														Post-hoc
Shrestha	Regional Environmental Change														Post-hoc
Shrestha et al.	International Journal of Biodiversity and Conservation														Post-hoc
Song et al.	Mountain Research and Development	Distributions of dominant tree species on the Tibetan Plateau under current and future climate scenarios	2004	BIOD	2	Species distribution modeling of tree species in Tibetan plateau with projections to different future scenarios									Post-hoc
Uprety et al.	Journal of Ethnobiology and Ethnomedicine														Post-hoc
Vetaas & Grytnes	Global Ecology & Biogeography														Post-hoc

## Sheet: Pub type
Type of Publication	No.
Conference papers	IIIII
Book chapter	I
Theor Appl Climatol	II
Current Science	III
Journal of Forest & Livelihood	II
Biological Conservation	II
Climatic Past	I
Environmental Science & Policy	I
International NGO Journal	I
Journal of Agriculture & environment	I
Reg Environ Change	III
Veget Hist Archaeobot	I
American Meteorological Society	I
Plos One	IIIII
Nature Climate Change	I
Conservation Biology	I
Journal of Biogeography	I
Biology Letters	I
Journal of Earth System Science	I
Journal of The Faculty of Agriculture Kyushu University	I
Journal of Geographical Sciences	I
Ecology & Evolution	I
Ecological Complexity	I
Journal of Ethnobiology	II
Ecology Letters	I
Forest Ecology & Management	I
Climatic Change	IIIII
International Journal of Climatology	I
Environmental Management	I
Ecological Economics	I
Nature	I
Quarterly Journal from the Royal Meteorogical Society	I
Global Ecology & Biogeography	II
Journal of Mountain Science	I
Nepal Journal of Science and Technology	I
Climate Dynamics	II
Global Environmental Change	I
Geophysical Research Letters	I
International Journal of Biodiversity and Conservation	I
Mountain Research and Development	I
Journal of Ethnobiology and Ethnomedicine	I
